# Supplementary material for: Using submersible fluorescence sensors to track the removal of organic matter in decentralized wastewater treatment systems (DEWATS) in real time
Source: Oxford University Press journal article supplement (doi:10.2166/wst.2017.573), 2017-11-23
Supplement: wst2017573supp.docx [file wst2017573supp.docx]

Using submersible fluorescence sensors to track the removal of organic matter in decentralized wastewater treatment systems (DEWATS) in real time

**SUPPLEMENTARY MATERIAL**

Figure S1. Experimental ABR-AF-CW system with three treatment trains. Trains 1 and 2 have seven ABR chambers; Train 3 has four ABR chambers. Each chamber is equipped with hatch for sampling.
